# Supplementary material
Source: MDPI journal article supplement (https://www.mdpi.com/2073-4395/11/1/79)
Supplement: s1 [file s1]

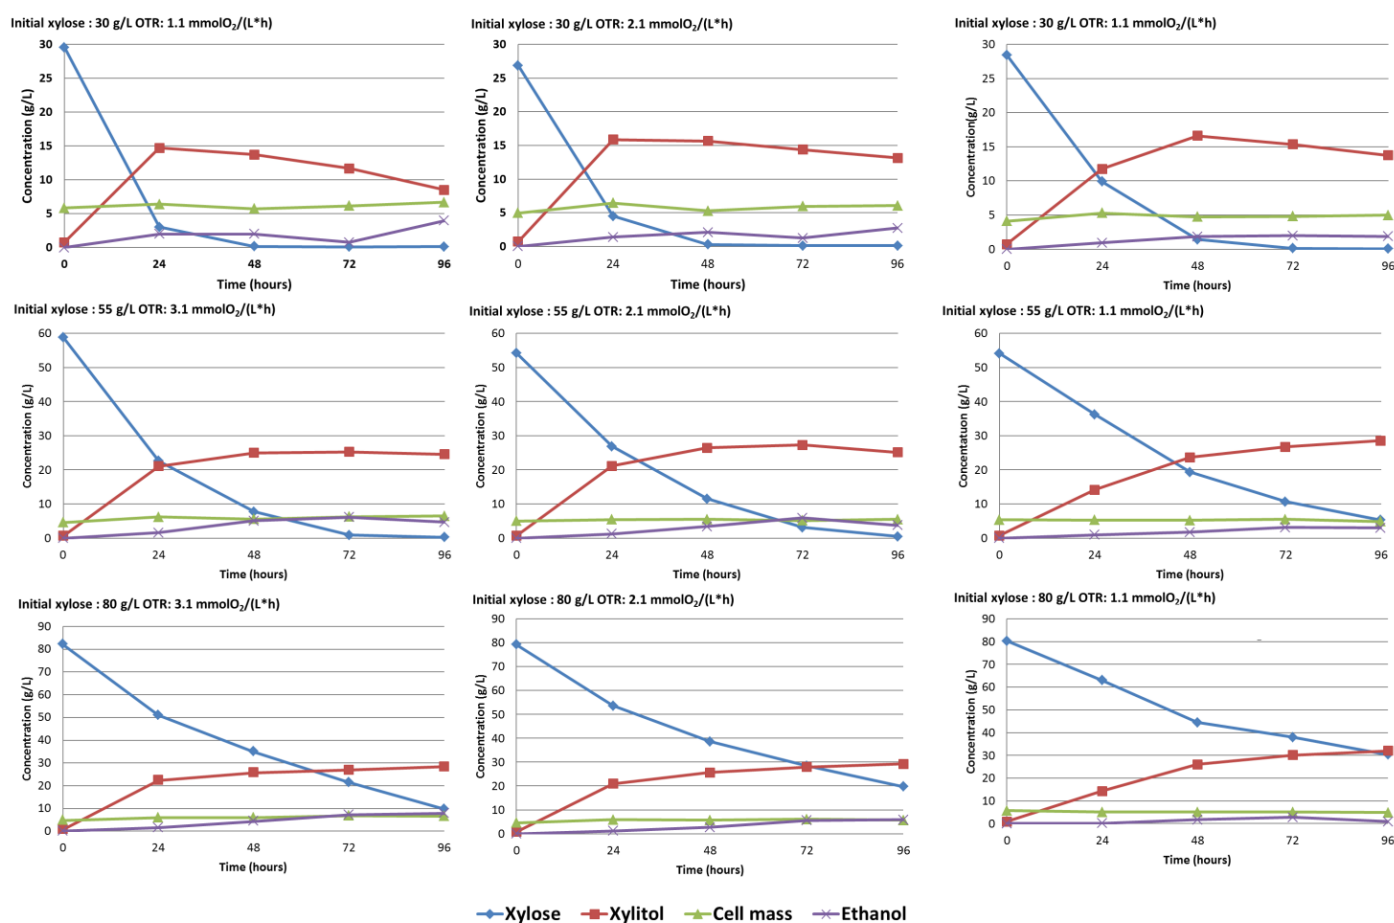

**Figure S1.** Fermentation profiles obtained during the designed experiments of xylitol production on semi-defined medium by *Candida boidinii* NCAIM Y.01308.

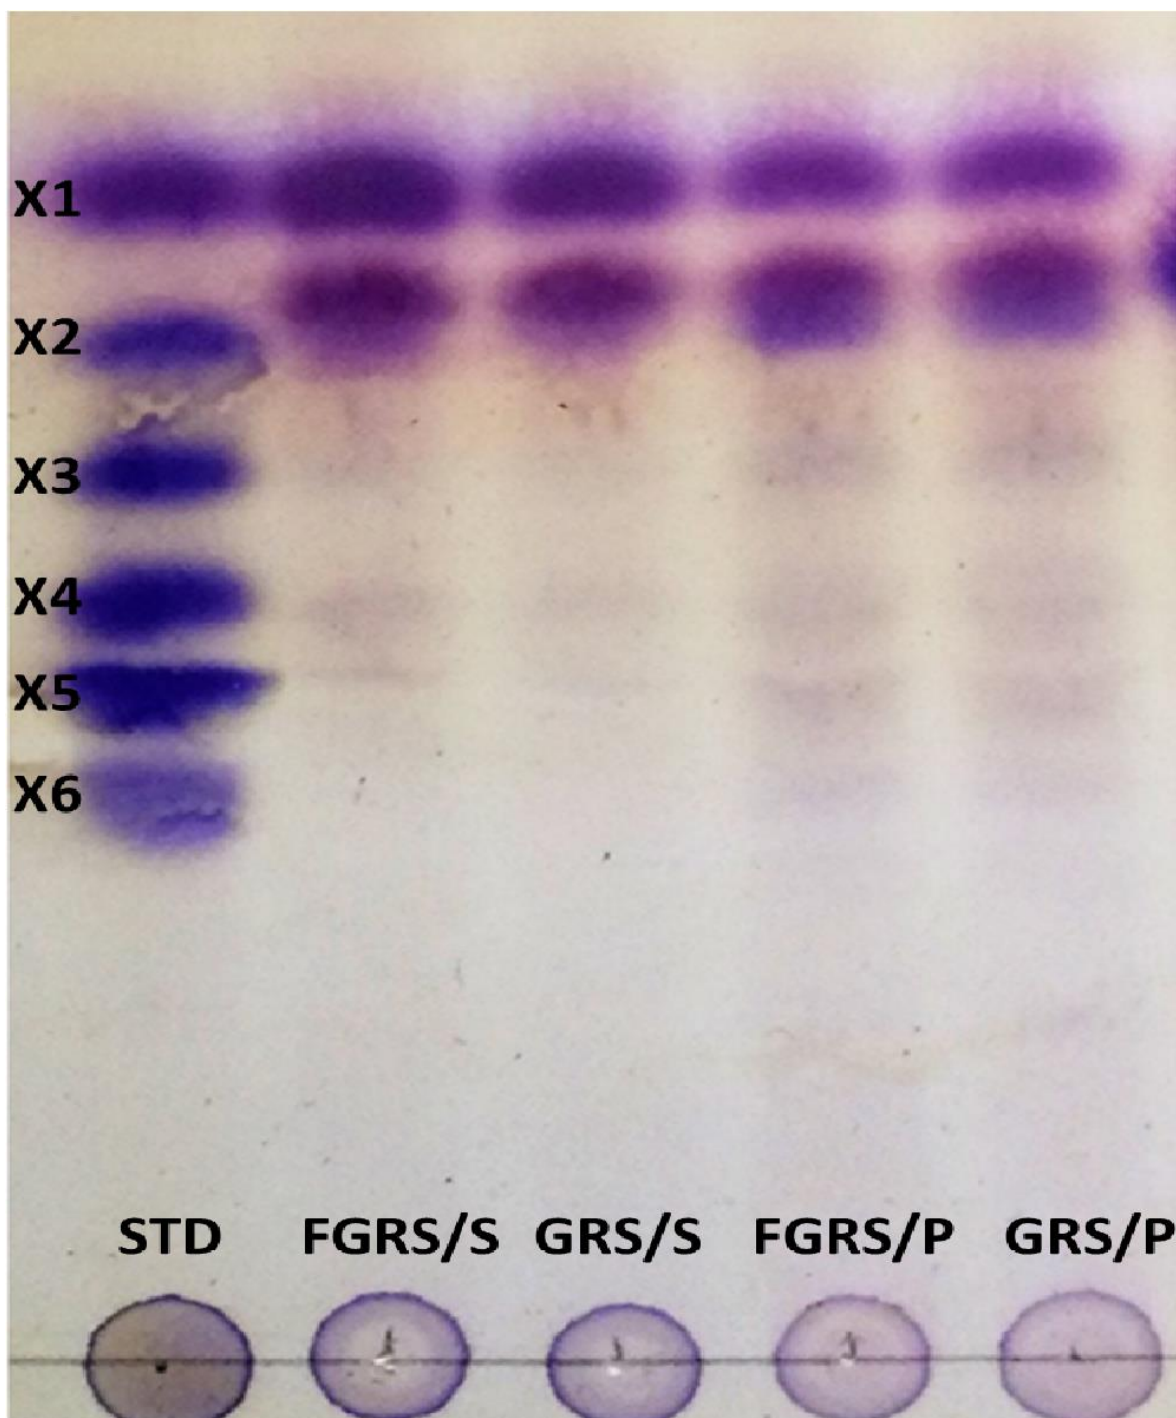

**Figure S2.** Thin-layer chromatography analysis of rice straw hydrolysates. STD: standard (X1: xylose X2: xylobiose X3: xylotriose, X4: xylotetraose X5: xylopentose X6: xylohexaose).
